# Supplementary material
Source: MDPI journal article supplement (https://www.mdpi.com/2306-5729/8/1/3)
Supplement: s1 [file s1]

Archive with 2 entries (2 files):
- Supplementary 1.xlsx
- Supplementary 2.pdf
