# Supplementary material
Source: MDPI journal article supplement (https://www.mdpi.com/2306-5729/8/1/3)
Supplement: s1 [file s1 › Supplementary 1.xlsx]

## Sheet: Table S1
Amino acids detected in the blood plasma of athletes before loading and after recovery
metabolite	Mean Concentration, (µM/l) BL*	Mean Concentration (µM/l) AR**	SD BL*	SD AR**	Fold Change
2-ketoglutaric Acid	0.521409	0.770494	0.337393	1.16261	1.47772
3-Methylhistidine	0.566779	1.57006	0.335304	1.08931	2.77014
Arginine	18.1932	4.85298	9.45666	0.760217	0.266747
Ascorbic Acid	1.16284	1.39777	0.829419	2.10014	1.20203
Aspartic acid	3.59755	2.4183	3.02723	1.86343	0.672207
Carnosine	0.470553	1.0441	0.151194	0.89804	2.21889
cis-Aconitic Acid	0.616637	0.791735	0.762733	1.03396	1.28396
Citric Acid	3.18517	2.14965	2.41061	1.8831	0.674895
Citrulline	3.85357	2.53962			0.659031
Epinephrine	26.4447	29.8528	8.66161	17.3009	1.12888
Fumaric Acid	1.97876	4.09026	0.813676	0.145226	2.06708
Glutamic acid	51.838	51.3664	9.2633	25.0276	0.990903
Glycine	55.1143	35.3002			0.64049
Histidine	21.5118	37.0803			1.72372
Hydroxyproline	1.41156	2.33929	0.261986	1.91426	1.65723
Lactic Acid	12.484	33.9116	1.50398	4.53056	2.71641
Lysine	9.73566	18.3258			1.88234
Methionine Sulfoxide	38.2064	69.8277			1.82764
Ornitine	2.58349	6.26369			2.4245
Oxalic Acid	7.31095	3.68925			0.50462
Phenilalanine	10.9272	21.3376			1.95271
Serine	28.5857	31.1464	18.4118	11.3949	1.08958
Succinic Acid	0.0809705	0.347342	0.0921314	0.344574	4.28974
Taurine	22.7246	32.5667	3.16837	19.0387	1.4331
Tryptophane oxidized	468.146	271.651	112.74	25.6861	0.580271
* BL – before loading; **AR – after recovery.

## Sheet: Table S2
Hormones detected in the blood plasma of athletes before loading and after recovery
Hormones	AV Area of Chromatographic Peak BL*	AV Area of Chromatographic Peak Width AR**	SD BL*	SD AR**	Fold Change
11-Deoxycortisol (Cortodoxone)	2889.67	5391.38	1645.25	6438.11	1.86
Allopregnenolone	244.88	82.03	204.59	59.42	0.33
Cort_to_DHEA	1.30	0.66	1.16	0.66	0.50
Cortisol	1939.06	1508.23	1209.42	1962.85	0.77
Dehydroepiandrosterone (DHEA-H2O)	4063.37	3718.52	5086.45	2710.09	0.91
Estriol (E3)	271.84	631.08	242.78	935.85	2.32
* BL – before loading; **AR – after recovery.
